# Supplementary material
Source: publisher site journal article supplement (https://www.dovepress.com/article/134287)
Supplement: Supplementary file 1 [file get_supplementary_file.php]

## Supplementary information

### Study site information:

Argentina (5 sites), Australia (2 sites), Austria (1 site), Belgium (7 sites), Brazil (1 site), Bulgaria (4 sites), Canada (5 sites), China (15 sites), Czech Republic (7 sites), France (4 sites), Germany (5 sites), Greece (3 sites), Hungary (6 sites), Japan (43 sites), Mexico (4 sites), Poland (8 sites), Portugal (5 sites), Republic of Korea (4 sites), Romania (2 sites), Russia (19 sites), Slovakia (4 sites), Spain (10 sites), Sweden (1 site), Taiwan (4 sites), Ukraine (8 sites), and USA (24 sites).

### Study IEC/IRB information:

The IEC/IRB list for the East Asian countries included in this post hoc study is as follows

| Country | IEC/IRB Name and Address                                                                                             |
|---------|----------------------------------------------------------------------------------------------------------------------|
| China   | Beijing Anding Hospital<br>Ankanghutong Xicheng district, Beijing<br>Beijing<br>China                                |
|         | Peking University of Institute of Mental Health<br>No 51 Huayuanbei Road<br>Beijing, Beijing, 100191<br>China        |
|         | IEC of Shanghai Mental Health Center<br>No 600 South Wan Ping Road<br>Shanghai, 200030<br>China                      |
|         | Guangzhou Brian Hospital<br>36 Fangcun Mingxin Road Guangzhou China N/A N/A<br>Guangzhou, 510370<br>China            |
|         | The 3rd Affiliated Hospital of Sun Yatsen University<br>No.600, Tianhe Road, Guangzhou<br>Guangzhou, 510630<br>China |

|  |                                                                                                                                         |
|--|-----------------------------------------------------------------------------------------------------------------------------------------|
|  | IEC of the first affiliated hospital of Kunming Medical University<br>No 2 Kunshi Rd Wuhua District<br>Kunming, Yunnan, 650032<br>China |
|  | IEC of Renmin Hospital of Wuhan University<br>No 238 Jiefang Road Wuchang District<br>Wuhan, Hubei, 430060<br>China                     |
|  | The Institution of Beijing Huilongguan Hospital<br>Huilongguan street, Changping District<br>Beijing, 102200<br>China                   |
|  | IEC of The Second People's Hospital, Hunan Province<br>No 427 The Third Block Middle Furong Road<br>Changsha, Hunan, 410007<br>China    |
|  | IEC of Xi'an Mental Health center<br>15 Yanyin Road Qujiang New District<br>Xian, Shaanxi, 710061<br>China                              |
|  | IEC of The First Affiliated of Fourth Military Medical University<br>No 127 Changlexi Road<br>Xian, Shaanxi, 710032<br>China            |
|  | Tianjin Anding Hospital<br>No.39, Wujiayao Road, Hexi District, Tianjin<br>Tianjin<br>China                                             |
|  | Second Affiliated Hospital of Zhejiang University of Medicine<br>No 88 Jiefang Road<br>Hangzhou, Zhejiang Province, 310009<br>China     |
|  | Nanjing Brain Hospital-IRB<br>No. 264, Guangzhou Road<br>Nanjing, 210029<br>China                                                       |

|              |                                                                                                                                                           |
|--------------|-----------------------------------------------------------------------------------------------------------------------------------------------------------|
|              | <p>The Institution of The mental health center of Hebei Province<br/> No.572 East Dongfeng Road<br/> Baoding, Hebei, 071000<br/> China</p>                |
|              | <p>Guangdong General Hospital<br/> 106 Zhongshan Er Road Guangzhou China NA NA<br/> Guangzhou, 510080<br/> China</p>                                      |
| <b>Japan</b> | <p>Kamitsuga General Hospital IRB<br/> 1-1033 Shimota-machi, Kanuma-City, Tochigi<br/> Kanuma, 322-0036<br/> Japan</p>                                    |
|              | <p>Seiwakai Shoda Hospital IRB<br/> 1-16-32 Annaka, Annaka-City, Gunma<br/> Annaka, 379-0116<br/> Japan</p>                                               |
|              | <p>Maebashi Hirosegawa Clinic IRB<br/> 2-10-9 Chiyoda-cho, Maebashi-City, Gunma<br/> Maebashi, 371-0022<br/> Japan</p>                                    |
|              | <p>Shinozuka Hospital IRB<br/> 105-1 Shinozuka, Fujioka-City, Gunma<br/> Fujioka, 375-0017<br/> Japan</p>                                                 |
|              | <p>Kohnodai Hospital IRB, National Center for Global Health and Medicine<br/> 1-7-1 Kohnodai, Ichikawa-City, Chiba<br/> Ichikawa, 272-8516<br/> Japan</p> |
|              | <p>Sakayori Clinic IRB<br/> 2-26-3 Higashi-Oi, Shinagawa-ku, Tokyo<br/> Tokyo, 140-0011<br/> Japan</p>                                                    |
|              | <p>National Center of Neurology and Psychiatry IRB<br/> 4-1-1 Ogawa Higashi-Cho, Kodaira-City, Tokyo<br/> Kodaira, 187-8551<br/> Japan</p>                |
|              | <p>Asai Dermatology Clinic IRB<br/> 1-14 Katabiracho, Hodogaya-ku, Yokohama-City, Kanagawa<br/> Yokohama, 240-0013<br/> Japan</p>                         |

|  |                                                                                                                                                         |
|--|---------------------------------------------------------------------------------------------------------------------------------------------------------|
|  | <p>Asai Dermatology Clinic IRB<br/> 1-14 Katabiracho, Hodogaya-ku, Yokohama-City, Kanagawa<br/> Yokohama, 240-0013<br/> Japan</p>                       |
|  | <p>Asai Dermatology Clinic IRB<br/> 1-14 Katabiracho, Hodogaya-ku, Yokohama-City, Kanagawa<br/> Yokohama, 240-0013<br/> Japan</p>                       |
|  | <p>Yamanashi Prefectural Kita Hospital IRB<br/> 3314-13, Kamijominamiwari, Asahi-machi, Nirasaki-City, Yamanashi<br/> Nirasaki, 407-0046<br/> Japan</p> |
|  | <p>Japanese Red Cross Society Azumino Hospital IRB<br/> 5685 Toyoshina, Azumino-City, Nagano<br/> Azumino<br/> Japan</p>                                |
|  | <p>Aichi Medical Association IRB<br/> 4-14-28 Sakae, Naka-ku, Nagoya-City, Aichi<br/> Nagoya, 460-0008<br/> Japan</p>                                   |
|  | <p>Fujita Health University Hospital IRB<br/> 1-98 Dengakugakubo Kutsukake-cho, Toyoake-City, Aichi<br/> Toyoake, 470-1192<br/> Japan</p>               |
|  | <p>Hinaga general center for mental care IRB<br/> 5039 Hinaga, Yokkaichi-City, Mie<br/> Yokkaichi, 510-8575<br/> Japan</p>                              |
|  | <p>Osaka Medical College Hospital IRB<br/> 2-7 Daigaku-Machi, Takatsuki-City, Osaka<br/> Takatsuki, 569-8686<br/> Japan</p>                             |
|  | <p>Kansai Medical University Takii Hospital IRB<br/> 10-15 Fumizono-Cho, Moriguchi-City, Osaka<br/> Moriguchi, 570-8507<br/> Japan</p>                  |
|  | <p>Nakameguro Atlas Clinic IRB<br/> 1-26-1 Kamimeguro, Meguro-ku, Tokyo<br/> Tokyo, 153-0051<br/> Japan</p>                                             |

|              |                                                                                                              |
|--------------|--------------------------------------------------------------------------------------------------------------|
|              | Nara Medical University Hospital IRB<br>840 Shijyo-cho, Kashihara-City, Nara<br>Kashihara, 634-8522<br>Japan |
|              | Hayakawa Clinic IRB<br>2-7-4 Hiro-obiro, Kure-City, Hiroshima<br>Kure, 737-0111<br>Japan                     |
| <b>Korea</b> | Chonnam National University Hospital IRB<br>42 Jebongro, Dong-gu<br>Gwangju-si 501-757<br>Korea              |

**Table S1. Extent of exposure over time for patients in the East Asian subgroup treated with PP3M and PP1M in the double-blind phase (safety analysis set)**

| DB phase period     | Total        | DOSE, n (%)       |                   |                   |                   |
|---------------------|--------------|-------------------|-------------------|-------------------|-------------------|
|                     |              | n (%)             | 175 mg eq.        | 263 mg eq.        | 350 mg eq.        |
| <b>PP3M (n=170)</b> | <b>n (%)</b> | <b>175 mg eq.</b> | <b>263 mg eq.</b> | <b>350 mg eq.</b> | <b>525 mg eq.</b> |
| Day 1               | 170 (100)    | 5 (3)             | 18 (11)           | 83 (49)           | 64 (38)           |
| Week 8              | 1 (1)        | 0 (0)             | 0 (0)             | 1 (100)           | 0 (0)             |
| Week 12             | 150 (88)     | 3 (2)             | 16 (11)           | 71 (47)           | 60 (40)           |
| Week 24             | 140 (82)     | 3 (2)             | 14 (10)           | 68 (49)           | 55 (39)           |
| Week 32             | 1 (1)        | 0 (0)             | 0 (0)             | 1 (100)           | 0 (0)             |
| Week 36             | 130 (76)     | 3 (2)             | 10 (8)            | 64 (49)           | 53 (41)           |
| <b>PP1M (n=174)</b> | <b>n (%)</b> | <b>50 mg eq.</b>  | <b>75 mg eq.</b>  | <b>100 mg eq.</b> | <b>150 mg eq.</b> |
| Day 1               | 174 (100)    | 6 (3)             | 19 (11)           | 77 (44)           | 72 (41)           |
| Week 4              | 165 (95)     | 6 (4)             | 17 (10)           | 76 (46)           | 66 (40)           |
| Week 8              | 160 (92)     | 6 (4)             | 17 (11)           | 75 (47)           | 62 (39)           |
| Week 12             | 156 (90)     | 5 (3)             | 17 (11)           | 73 (47)           | 61 (39)           |
| Week 16             | 151 (87)     | 5 (3)             | 17 (11)           | 71 (47)           | 58 (38)           |
| Week 20             | 147 (84)     | 5 (3)             | 17 (12)           | 69 (47)           | 56 (38)           |
| Week 24             | 139 (80)     | 5 (4)             | 17 (12)           | 63 (45)           | 54 (39)           |
| Week 28             | 137 (79)     | 5 (4)             | 17 (12)           | 62 (45)           | 53 (39)           |
| Week 32             | 135 (78)     | 5 (4)             | 17 (13)           | 60 (44)           | 53 (39)           |
| Week 36             | 132 (76)     | 5 (4)             | 17 (13)           | 59 (45)           | 51 (39)           |
| Week 40             | 129 (74)     | 5 (4)             | 17 (13)           | 58 (45)           | 49 (38)           |
| Week 44             | 125 (72)     | 5 (4)             | 17 (14)           | 57 (46)           | 46 (37)           |

**Notes:** Within each dose level, the percentages are based on the number of patients who had an injection administered at this visit

**Abbreviations:** DB, double-blind; eq, equivalent; n, number of patients in a subset; PP1M, paliperidone palmitate once-monthly formulation; PP3M, paliperidone palmitate three-monthly formulation

**Table S2. Extent of exposure over time for patients in the Chinese subgroup treated with PP3M and PP1M in the double-blind phase (safety analysis set)**

| DB phase period     | Total<br>n (%) | DOSE, n (%)      |                  |                   |                   |
|---------------------|----------------|------------------|------------------|-------------------|-------------------|
|                     |                | 175 mg eq.       | 263 mg eq.       | 350 mg eq.        | 525 mg eq.        |
| <b>PP3M (n=104)</b> |                |                  |                  |                   |                   |
| Day 1               | 104 (100)      | 3 (3)            | 3 (3)            | 53 (51)           | 45 (43)           |
| Week 8              | 1 (1)          | 0 (0)            | 0 (0)            | 1 (100)           | 0                 |
| Week 12             | 95 (91)        | 3 (3)            | 3 (3)            | 45 (47)           | 44 (46)           |
| Week 24             | 90 (87)        | 3 (3)            | 2 (2)            | 44 (49)           | 41 (46)           |
| Week 36             | 87 (84)        | 3 (3)            | 2 (2)            | 42 (48)           | 40 (46)           |
| <b>PP1M (n=106)</b> |                | <b>50 mg eq.</b> | <b>75 mg eq.</b> | <b>100 mg eq.</b> | <b>150 mg eq.</b> |
| Day 1               | 106 (100)      | 0 (0)            | 4 (4)            | 52 (49)           | 50 (47)           |
| Week 4              | 102 (96)       | 0 (0)            | 4 (4)            | 52 (51)           | 46 (45)           |
| Week 8              | 101 (95)       | 0 (0)            | 4 (4)            | 52 (51)           | 45 (45)           |
| Week 12             | 98 (92)        | 0 (0)            | 4 (4)            | 50 (51)           | 44 (45)           |
| Week 16             | 96 (91)        | 0 (0)            | 4 (4)            | 50 (52)           | 42 (44)           |
| Week 20             | 93 (88)        | 0 (0)            | 4 (4)            | 48 (52)           | 41 (44)           |
| Week 24             | 89 (84)        | 0 (0)            | 4 (4)            | 45 (51)           | 40 (45)           |
| Week 28             | 88 (83)        | 0 (0)            | 4 (5)            | 44 (50)           | 40 (45)           |
| Week 32             | 87 (82)        | 0 (0)            | 4 (5)            | 43 (49)           | 40 (46)           |
| Week 36             | 86 (81)        | 0 (0)            | 4 (5)            | 43 (50)           | 39 (45)           |
| Week 40             | 84 (79)        | 0 (0)            | 4 (5)            | 42 (50)           | 38 (45)           |
| Week 44             | 80 (75)        | 0 (0)            | 4 (5)            | 41 (51)           | 35 (44)           |

**Notes:** Within each dose level, the percentages are based on the number of patients who had an injection administered at this visit

**Abbreviations:** DB, double-blind; eq, equivalent; n, number of patients in a subset; PP1M, paliperidone palmitate once-monthly formulation; PP3M, paliperidone palmitate three-monthly formulation

**Table S3. Extent of exposure over time for patients in the Japanese subgroup treated with PP3M and PP1M in the double-blind phase (safety analysis set)**

| DB phase period    | Total<br>n (%) | DOSE, n (%)      |                  |                   |                   |
|--------------------|----------------|------------------|------------------|-------------------|-------------------|
|                    |                | 175 mg eq.       | 263 mg eq.       | 350 mg eq.        | 525 mg eq.        |
| <b>PP3M (n=52)</b> | <b>n (%)</b>   |                  |                  |                   |                   |
| Day 1              | 52 (100)       | 2 (4)            | 13 (25)          | 25 (48)           | 12 (23)           |
| Week 12            | 42 (81)        | 0 (0)            | 11 (26)          | 22 (52)           | 9 (21)            |
| Week 24            | 39 (75)        | 0 (0)            | 11 (28)          | 20 (51)           | 8 (21)            |
| Week 36            | 33 (63)        | 0 (0)            | 7 (21)           | 18 (55)           | 8 (24)            |
| <b>PP1M (n=56)</b> | <b>n (%)</b>   | <b>50 mg eq.</b> | <b>75 mg eq.</b> | <b>100 mg eq.</b> | <b>150 mg eq.</b> |
| Day 1              | 56 (100)       | 5 (9)            | 13 (23)          | 22 (39)           | 16 (29)           |
| Week 4             | 52 (93)        | 5 (10)           | 11 (21)          | 21 (40)           | 15 (29)           |
| Week 8             | 48 (86)        | 5 (10)           | 11 (23)          | 20 (42)           | 12 (25)           |
| Week 12            | 47 (84)        | 4 (9)            | 11 (23)          | 20 (43)           | 12 (26)           |
| Week 16            | 45 (80)        | 4 (9)            | 11 (24)          | 18 (40)           | 12 (27)           |
| Week 20            | 44 (79)        | 4 (9)            | 11 (25)          | 18 (41)           | 11 (25)           |
| Week 24            | 40 (71)        | 4 (10)           | 11 (28)          | 15 (38)           | 10 (25)           |
| Week 28            | 39 (70)        | 4 (10)           | 11 (28)          | 15 (38)           | 9 (23)            |
| Week 32            | 38 (68)        | 4 (11)           | 11 (29)          | 14 (37)           | 9 (24)            |
| Week 36            | 36 (64)        | 4 (11)           | 11 (31)          | 13 (36)           | 8 (22)            |
| Week 40            | 36 (64)        | 4 (11)           | 11 (31)          | 13 (36)           | 8 (22)            |
| Week 44            | 36 (64)        | 4 (11)           | 11 (31)          | 13 (36)           | 8 (22)            |

**Notes:** Within each dose level, the percentages are based on the number of patients who had an injection administered at this visit

**Abbreviations:** DB, double-blind; eq, equivalent; n, number of patients in a subset; PP1M, paliperidone palmitate once-monthly formulation; PP3M, paliperidone palmitate three-monthly formulation



**Table S4. Prior unique antipsychotic medication use in patients (Intent-to-treat open-label analysis set)**

|                                                                            | OL phase (PPIM)  |                  |                      |                    |
|----------------------------------------------------------------------------|------------------|------------------|----------------------|--------------------|
|                                                                            | China<br>(n=296) | Japan<br>(n=175) | East Asia<br>(n=510) | Global<br>(N=1429) |
| <b>Total number of patients with prior psychotropic medications, n (%)</b> | 248 (84)         | 175 (100)        | 459 (90)             | 1291 ( 90)         |
| <b>Atypical antipsychotics</b>                                             | 222 (75)         | 164 (94)         | 422 (83)             | 1084 (76)          |
| Risperidone                                                                | 134 (45)         | 74 (42)          | 226 (44)             | 492 (34)           |
| Paliperidone                                                               | 39 (13)          | 74 (42)          | 132 (26)             | 304 (21)           |
| Olanzapine                                                                 | 39 (13)          | 26 (15)          | 70 (14)              | 227 (16)           |
| Quetiapine                                                                 | 33 (11)          | 13 (7)           | 54 (11)              | 156 (11)           |
| Aripiprazole                                                               | 25 (8)           | 30 (17)          | 63 (12)              | 141 (10)           |
| Amisulpride                                                                | 1 (<1)           | 0 (0)            | 4 (1)                | 25 (2)             |
| Blonanserin                                                                | 0 (0)            | 18 (10)          | 20 (4)               | 20 (1)             |
| Ziprasidone                                                                | 10 (3)           | 0 (0)            | 11 (2)               | 16 (1)             |
| Clozapine                                                                  | 5 (2)            | 0 (0)            | 5 (1)                | 7 (<1)             |
| Sertindole                                                                 | 0 (0)            | 0 (0)            | 0 (0)                | 5 (<1)             |
| Asenapine                                                                  | 0 (0)            | 0 (0)            | 0 (0)                | 4 (<1)             |
| Iloperidone                                                                | 0 (0)            | 0 (0)            | 0 (0)                | 4 (<1)             |
| Lurasidone                                                                 | 0 (0)            | 0 (0)            | 0 (0)                | 3 (<1)             |
| Perospirone                                                                | 3 (1)            | 0 (0)            | 3 (1)                | 3 (<1)             |
| Levosulpiride                                                              | 1 (<1)           | 0 (0)            | 1 (<1)               | 1 (<1)             |
| <b>Typical antipsychotics, n (%)</b>                                       | 47 (16)          | 37 (21)          | 98 (19)              | 325 (23)           |
| Haloperidol                                                                | 23 (8)           | 10 (6)           | 45 (9)               | 160 (11)           |
| Levomepromazine                                                            | 0 (0)            | 4 (2)            | 4 (1)                | 48 (3)             |
| Chlorpromazine                                                             | 3 (1)            | 8 (5)            | 13 (3)               | 36 (3)             |
| Chlorprothixene                                                            | 0 (0)            | 0 (0)            | 0 (0)                | 33 (2)             |
| Promethazine                                                               | 5 (2)            | 12 (7)           | 17 (3)               | 33 (2)             |
| Zuclopenthixol                                                             | 0 (0)            | 0 (0)            | 0 (0)                | 30 (2)             |

|                                    |               |                |                |                 |
|------------------------------------|---------------|----------------|----------------|-----------------|
| Sulpiride                          | 18 (6)        | 0 (0)          | 20 (4)         | 21 (1)          |
| Trifluoperazine                    | 0 (0)         | 0 (0)          | 0              | 19 (1)          |
| Levomepromazine maleate            | 0 (0)         | 11 (6)         | 11 (2)         | 12 (1)          |
| Perphenazine                       | 7 (2)         | 0 (0)          | 7 (1)          | 11 (1)          |
| Perazine                           | 0 (0)         | 0 (0)          | 0 (0)          | 6 (<1)          |
| Cyamemazine                        | 0 (0)         | 0 (0)          | 0 (0)          | 4 (<1)          |
| Flupentixol                        | 0 (0)         | 0 (0)          | 0 (0)          | 4 (<1)          |
| Zotepine                           | 0 (0)         | 3 (2)          | 4 (1)          | 4 (<1)          |
| Clotiapine                         | 0 (0)         | 0 (0)          | 0 (0)          | 3 (<1)          |
| Pimozide                           | 0 (0)         | 0 (0)          | 0 (0)          | 3 (<1)          |
| Prothipendyl                       | 0 (0)         | 0 (0)          | 0 (0)          | 3 (<1)          |
| Fluphenazine                       | 0 (0)         | 0 (0)          | 0 (0)          | 2 (<1)          |
| Nemonapride                        | 0 (0)         | 2 (1)          | 2 (<1)         | 2 (<1)          |
| Periciazine                        | 0 (0)         | 2 (1)          | 2 (<1)         | 2 (<1)          |
| Levomepromazine hydrochloride      | 0 (0)         | 1 (1)          | 1 (<1)         | 1 (<1)          |
| Loxapine                           | 0 (0)         | 0 (0)          | 0 (0)          | 1 (<1)          |
| Melperone                          | 0 (0)         | 0 (0)          | 0 (0)          | 1 (<1)          |
| Thioridazine                       | 0 (0)         | 0 (0)          | 0 (0)          | 1 (<1)          |
| Tiotixene                          | 0 (0)         | 0 (0)          | 0 (0)          | 1 (<1)          |
| <b>Depot antipsychotics, n (%)</b> | <b>11 (4)</b> | <b>56 (32)</b> | <b>70 (14)</b> | <b>210 (15)</b> |
| Risperidone                        | 4 (1)         | 41 (23)        | 47 (9)         | 94 (7)          |
| Haloperidol decanoate              | 3 (1)         | 10 (6)         | 13 (3)         | 41 (3)          |
| Paliperidone palmitate             | 1 (<1)        | 0 (0)          | 1 (<1)         | 23 (2)          |
| Fluphenazine decanoate             | 1 (<1)        | 4 (2)          | 6 (1)          | 17 (1)          |
| Zuclopenthixol                     | 0 (0)         | 0 (0)          | 0 (0)          | 11 (1)          |
| Flupentixol decanoate              | 0 (0)         | 0 (0)          | 0 (0)          | 9 (1)           |
| Pipotiazine palmitate              | 2 (1)         | 0 (0)          | 2 (<1)         | 4 (<1)          |
| Zuclopenthixol decanoate           | 0 (0)         | 0 (0)          | 0 (0)          | 4 (<1)          |
| Fluphenazine                       | 0 (0)         | 0 (0)          | 0 (0)          | 2 (<1)          |
| Haloperidol                        | 0 (0)         | 0 (0)          | 0 (0)          | 2 (<1)          |
| Olanzapine                         | 0 (0)         | 0 (0)          | 0 (0)          | 2 (<1)          |
| Aripiprazole                       | 0 (0)         | 0 (0)          | 0 (0)          | 1 (<1)          |

|                       |       |       |        |        |
|-----------------------|-------|-------|--------|--------|
| Bromperidol           | 0 (0) | 1 (1) | 1 (<1) | 1 (<1) |
| Flupentixol           | 0 (0) | 0 (0) | 0 (0)  | 1 (<1) |
| Fluphenazine enantate | 0 (0) | 0 (0) | 0 (0)  | 1 (<1) |
| Olanzapine embonate   | 0 (0) | 0 (0) | 0 (0)  | 1 (<1) |

---

**Notes:** Percentages calculated with the number of patients in each group as denominator.

**Abbreviations:** OL, open-label; N, total number of patients; n, number of patients in a subset; PP1M, paliperidone palmitate 1-monthly formulation; PP3M, paliperidone palmitate 3-monthly formulation

**Table S5. Concomitant benzodiazepine medication use in patients during the double-blind phase of the study (safety analysis set)**

|                                                                 | PP3M             |                 |                         |                   | PP1M             |                 |                         |                   |
|-----------------------------------------------------------------|------------------|-----------------|-------------------------|-------------------|------------------|-----------------|-------------------------|-------------------|
|                                                                 | China<br>(n=104) | Japan<br>(n=52) | East<br>Asia<br>(n=170) | Global<br>(N=504) | China<br>(n=106) | Japan<br>(n=56) | East<br>Asia<br>(n=174) | Global<br>(N=512) |
| <b>Total number of patients with any benzodiazepines, n (%)</b> | 17 (16)          | 22 (42)         | 49 (29)                 | 120 (24)          | 15 (14)          | 27 (48)         | 46 (26)                 | 122 (24)          |
| Lorazepam                                                       | 9 (9)            | 19 (37)         | 37 (22)                 | 66 (13)           | 8 (8)            | 25 (45)         | 35 (20)                 | 70 (14)           |
| Clonazepam                                                      | 4 (4)            | 1 (2)           | 6 (4)                   | 33 (7)            | 2 (2)            | 1 (2)           | 5 (3)                   | 31 (6)            |
| Diazepam                                                        | 3 (3)            | 2 (4)           | 8 (5)                   | 23 (5)            | 2 (2)            | 1 (2)           | 4 (2)                   | 16 (3)            |
| Alprazolam                                                      | 1 (1)            | 0 (0)           | 1 (1)                   | 3 (1)             | 1 (1)            | 0 (0)           | 1 (1)                   | 3 (1)             |
| Brotizolam                                                      | 0 (0)            | 5 (10)          | 5 (3)                   | 5 (1)             | 0 (0)            | 0 (0)           | 0 (0)                   | 0 (0)             |
| Flunitrazepam                                                   | 0 (0)            | 1 (2)           | 1 (1)                   | 1 (<1)            | 0 (0)            | 4 (7)           | 4 (2)                   | 4 (1)             |
| Estazolam                                                       | 1 (1)            | 0 (0)           | 1 (1)                   | 1 (<1)            | 1 (1)            | 0 (0)           | 3 (2)                   | 3 (1)             |
| Nitrazepam                                                      | 1 (1)            | 0 (0)           | 1 (1)                   | 1 (<1)            | 0 (0)            | 2 (4)           | 2 (1)                   | 3 (1)             |
| Bromazepam                                                      | 0 (0)            | 0 (0)           | 0 (0)                   | 1 (<1)            | 0 (0)            | 0 (0)           | 0 (0)                   | 2 (<1)            |
| Midazolam                                                       | 0 (0)            | 0 (0)           | 0 (0)                   | 0 (0)             | 1 (1)            | 0 (0)           | 2 (1)                   | 3 (1)             |
| Quazepam                                                        | 0 (0)            | 2 (4)           | 2 (1)                   | 2 (<1)            | 0 (0)            | 1 (2)           | 1 (1)                   | 1 (<1)            |
| Temazepam                                                       | 0 (0)            | 0 (0)           | 1 (1)                   | 3 (1)             | 0 (0)            | 0 (0)           | 0 (0)                   | 0 (0)             |
| Etizolam                                                        | 0 (0)            | 1 (2)           | 1 (1)                   | 1 (<1)            | 0 (0)            | 1 (2)           | 1 (1)                   | 1 (<1)            |
| Flurazepam                                                      | 0 (0)            | 0 (0)           | 0 (0)                   | 2 (<1)            | 0 (0)            | 0 (0)           | 0 (0)                   | 0 (0)             |
| Oxazepam                                                        | 0 (0)            | 0 (0)           | 0 (0)                   | 1 (<1)            | 0 (0)            | 0 (0)           | 0 (0)                   | 1 (<1)            |
| Phenazepam                                                      | 0 (0)            | 0 (0)           | 0 (0)                   | 1 (<1)            | 0 (0)            | 0 (0)           | 0 (0)                   | 1 (<1)            |
| Chlordiazepoxide                                                | 0 (0)            | 0 (0)           | 0 (0)                   | 1 (<1)            | 0 (0)            | 0 (0)           | 0 (0)                   | 0 (0)             |
| Lormetazepam                                                    | 0 (0)            | 0 (0)           | 0 (0)                   | 0 (0)             | 0 (0)            | 0 (0)           | 0 (0)                   | 1 (<1)            |
| Prazepam                                                        | 0 (0)            | 0 (0)           | 0 (0)                   | 0 (0)             | 0 (0)            | 0 (0)           | 0 (0)                   | 1 (<1)            |
| Tetrazepam                                                      | 0 (0)            | 0 (0)           | 0 (0)                   | 1 (<1)            | 0 (0)            | 0 (0)           | 0 (0)                   | 0 (0)             |
| Triazolam                                                       | 0 (0)            | 1 (2)           | 1 (1)                   | 1 (<1)            | 0 (0)            | 0 (0)           | 0 (0)                   | 0 (0)             |

**Abbreviations:** N, total number of patients; n, number of patients in a subset; PP1M, paliperidone palmitate once-monthly formulation; PP3M, paliperidone palmitate three-monthly formulation.

**Table S6: Concomitant anti-Parkinson medication used in patients during open-label phase (intent-to-treat analysis set)**

|                                                                                       | <b>PP1M</b>              |                          |                              |                            |
|---------------------------------------------------------------------------------------|--------------------------|--------------------------|------------------------------|----------------------------|
|                                                                                       | <b>China<br/>(n=296)</b> | <b>Japan<br/>(n=175)</b> | <b>East Asia<br/>(n=510)</b> | <b>Global<br/>(N=1429)</b> |
| <b>Total number of patients with any anti-Parkinson medication in OL phase, n (%)</b> | 72 (24)                  | 37 (21)                  | 118 (23)                     | 207 (14)                   |
| Trihexyphenidyl                                                                       | 72 (24)                  | 11 (6)                   | 86 (17)                      | 98 (7)                     |
| Biperiden                                                                             | 0                        | 27 (15)                  | 29 (6)                       | 77 (5)                     |
| Benzatropine                                                                          | 0                        | 0                        | 2 (<1)                       | 29 (2)                     |
| Procyclidine                                                                          | 0                        | 0                        | 3 (1)                        | 5 (<1)                     |
| Ropinirole                                                                            | 0                        | 0                        | 0                            | 1 (<1)                     |

**Abbreviations:** N, total number of patients; n, number of patients in a subset; OL, open-label; PP1M, paliperidone palmitate once-monthly formulation; PP3M, paliperidone palmitate three-monthly formulation

**Table S7: Concomitant anti-Parkinson medication used in patients during double-blind phase (safety analysis set)**

|                                                                                       | PP1M             |                 |                      |                   | PP3M             |                 |                      |                   |
|---------------------------------------------------------------------------------------|------------------|-----------------|----------------------|-------------------|------------------|-----------------|----------------------|-------------------|
|                                                                                       | China<br>(n=106) | Japan<br>(n=56) | East Asia<br>(n=174) | Global<br>(N=512) | China<br>(n=104) | Japan<br>(n=52) | East Asia<br>(n=170) | Global<br>(N=504) |
| <b>Total number of patients with any anti-Parkinson medication in DB phase, n (%)</b> | 16 (15)          | 11 (20)         | 32 (18)              | 65 (13)           | 26 (25)          | 8 (15)          | 38 (22)              | 77 (15)           |
| Biperiden                                                                             | 0                | 9 (16)          | 11 (6)               | 31 (6)            | 0                | 7 (13)          | 9 (5)                | 30 (6)            |
| Trihexyphenidyl                                                                       | 15 (14)          | 3 (5)           | 19 (11)              | 24 (5)            | 26 (25)          | 0               | 28 (16)              | 36 (7)            |
| Benzatropine                                                                          | 0                | 0               | 1 (1)                | 8 (2)             | 0                | 0               | 0                    | 9 (2)             |
| Amantadine                                                                            | 0                | 0               | 0                    | 0                 | 0                | 0               | 0                    | 2 (<1)            |
| Carbidopa                                                                             | 0                | 0               | 0                    | 2 (<1)            | 0                | 0               | 0                    | 0                 |
| Levodopa                                                                              | 0                | 0               | 0                    | 2 (<1)            | 0                | 0               | 0                    | 0                 |
| Procyclidine                                                                          | 0                | 0               | 1 (1)                | 2 (<1)            | 0                | 0               | 0                    | 0                 |
| Anticholinergic agents                                                                | 1 (1)            | 0               | 1 (1)                | 1 (<1)            | 0                | 0               | 0                    | 0                 |
| Terguride                                                                             | 0                | 0               | 0                    | 0                 | 0                | 1 (2)           | 1 (1)                | 1 (<1)            |

**Abbreviations:** DB, double-blind; N, total number of patients; n, number of patients in a subset; PP1M, paliperidone palmitate once-monthly formulation; PP3M, paliperidone palmitate three-monthly formulation
